# Supplementary material for: The metabolites NADP+ and NADPH are the targets of the circadian protein Nocturnin (Curled)
Source: PubMed Central journal article supplement (PMC6542800; doi:10.1038/s41467-019-10125-z), 2019-05-30
Supplement: 41467_2019_10125_MOESM1_ESM.pdf [file 41467_2019_10125_MOESM1_ESM.pdf]

## Supplementary Figures

A

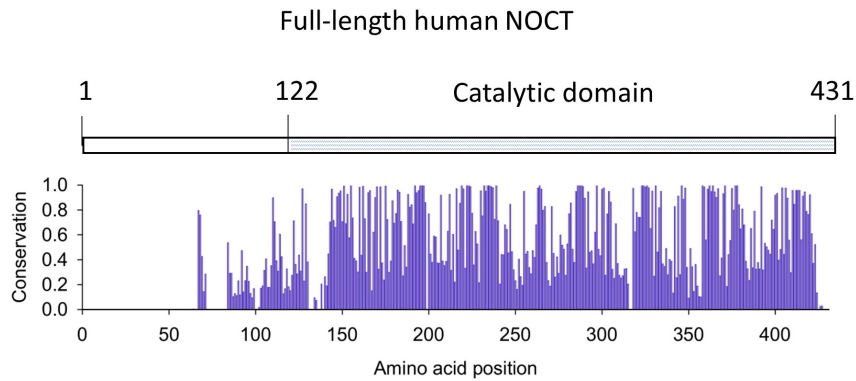

B

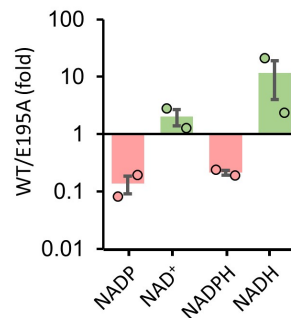

### Supplementary Figure S1. NOCT sequence and metabolite conversion activity. A)

Sequence alignment for 351 non-redundant NOCT sequences was used to compute the conservation values. Conservation was computed using SEQMOL-Kd (BiochemLabSolutions). **B)** The depletion of NADP(H) in the metabolite screen experiments (Fig. 1A) is accompanied by the expected increase in NAD(H). The basal levels of NAD<sup>+</sup> considerably exceed those of NADP<sup>+</sup>, which accounts for a smaller magnitude of NAD<sup>+</sup> increase compared to NADP<sup>+</sup> loss. Error bars are standard error (S.E.).

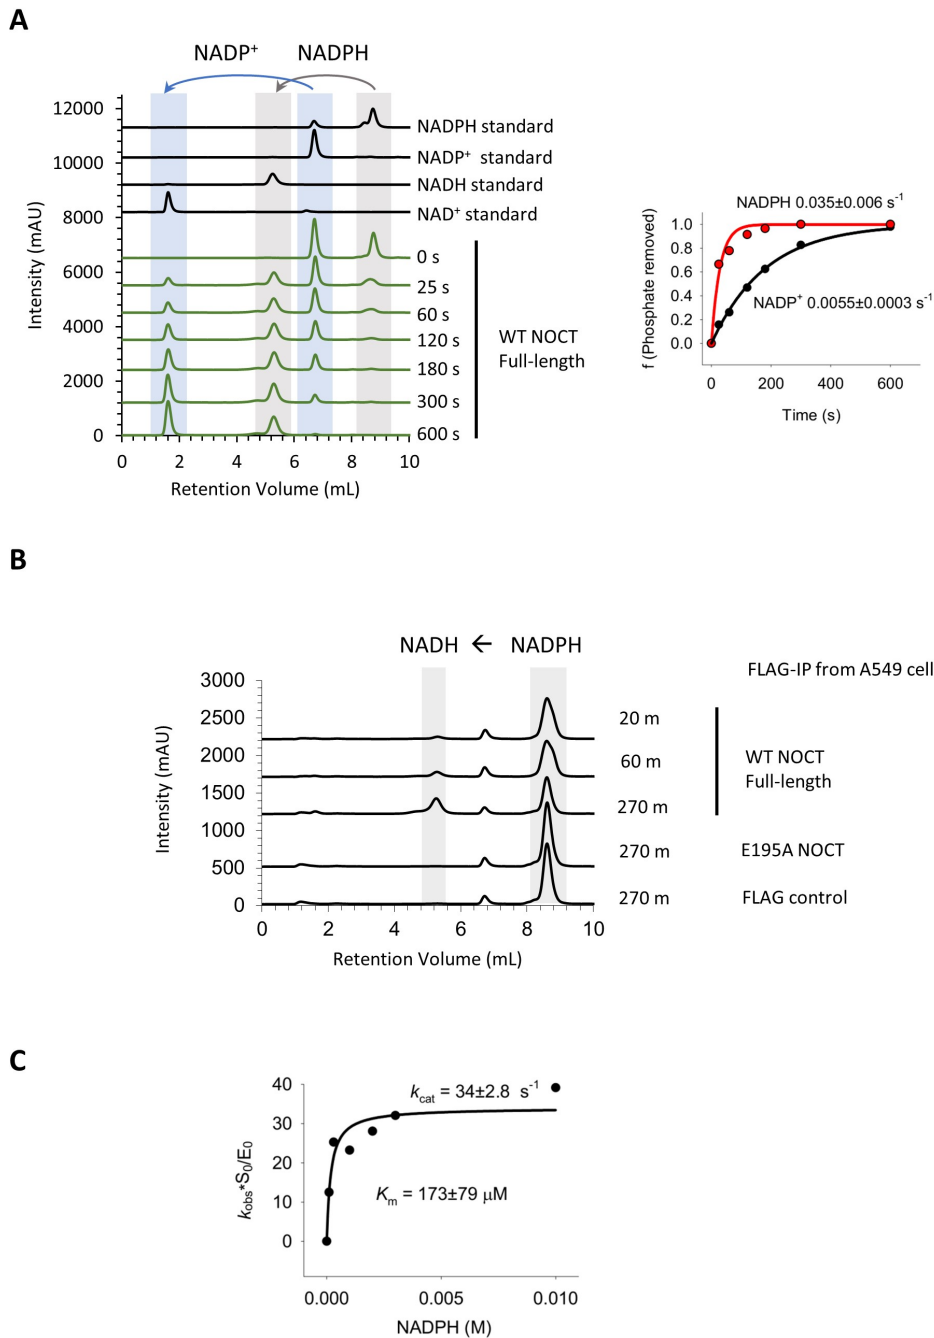

**Supplementary Figure S2. NADP<sup>+</sup> and NADPH cleavage analyses. A)** Left: Cleavage of NADP<sup>+</sup> and NADPH under conditions of kinetic competition. Reactions contained 0.5  $\mu\text{M}$  full-length WT human NOCT and 1 mM of each metabolite. Right: quantitation of the data fitted to single-exponential kinetics. **B)** A biologic replicate of NADPH (1 mM) cleavage by full-length NOCT on beads, which was purified from

human cells (related to Fig. 2E). **C**) Kinetic parameters for NADPH cleavage by full length NOCT determined using 0.5  $\mu\text{M}$  NOCT and as in Fig. 2C. Source data are provided as a Source Data file.

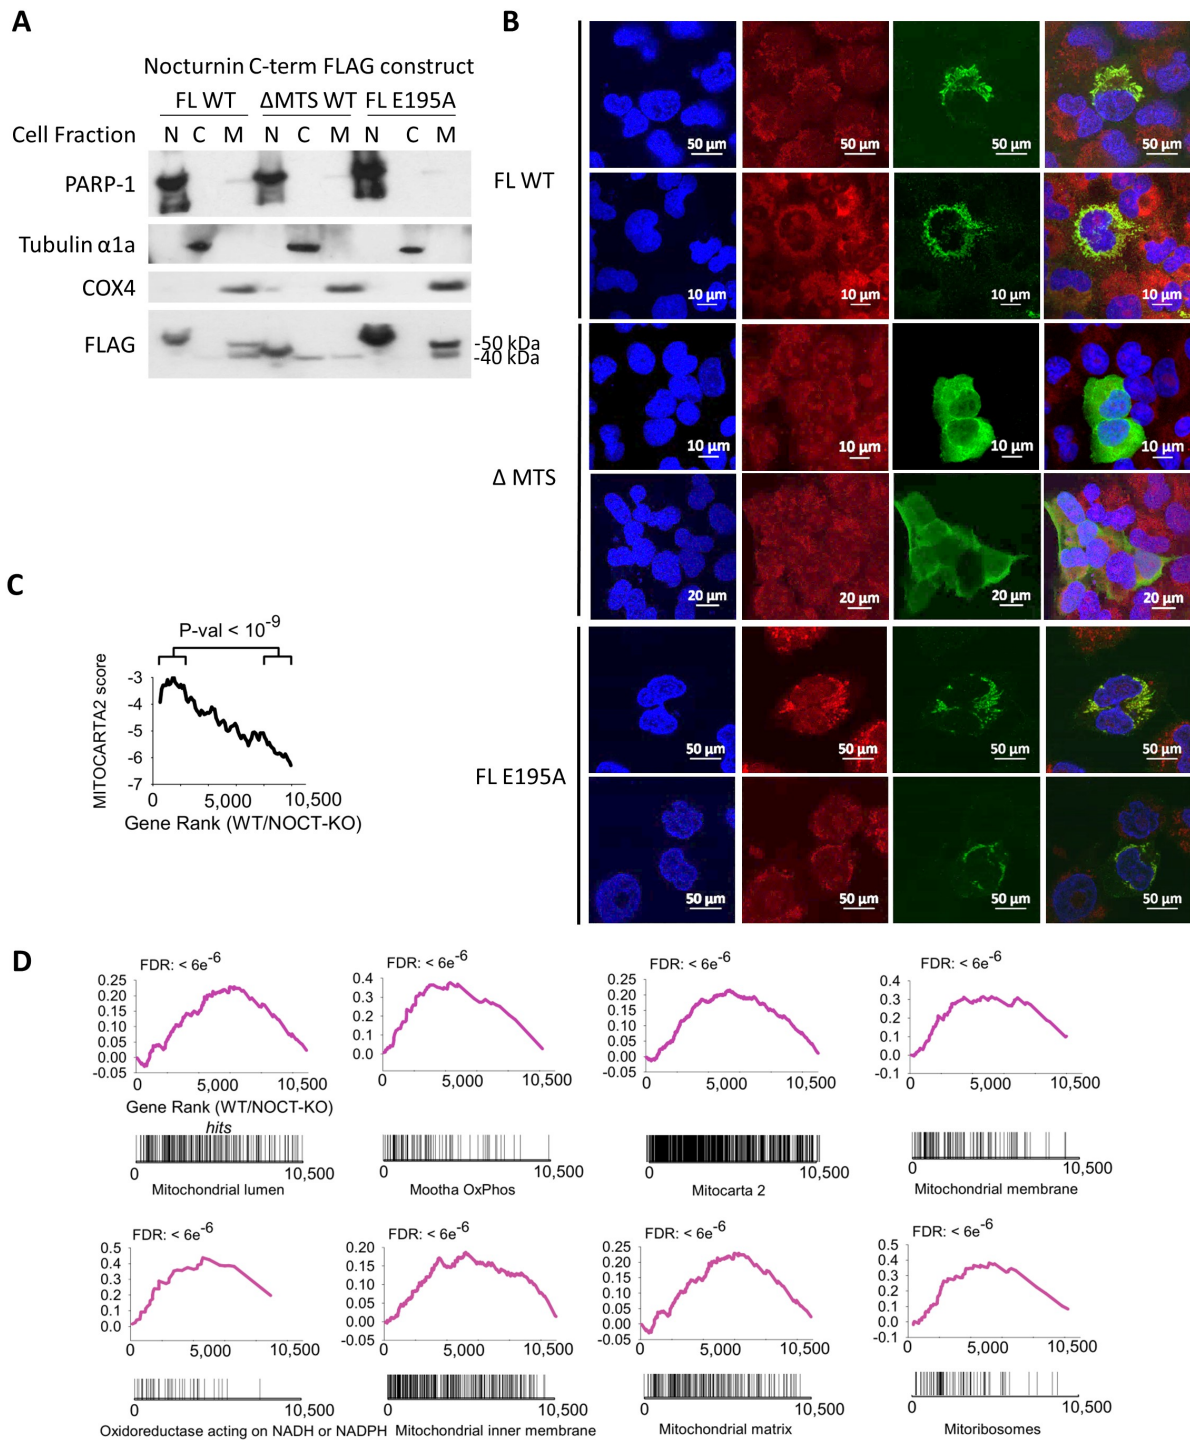

**Supplementary Figure S3. NOCT localization and effect on transcription in human cells. A)** Subcellular fractionation and western blot analysis of NOCT variants related to Fig. 3C. **B)** Confocal microscopy of FLAG-NOCT, WT,  $\Delta$ MTS and E195A active site

mutant related to Fig. 3D. **C)** Running average of MitoCarta 2 scores for mRNAs upregulated in WT vs NOCT<sup>-/-</sup> cells, as determined by RNA-seq. The P-values were obtained as in Fig. 3E. RNA-seq data represent four RNA-seq experiments: two in WT cells and two in independently derived NOCT-KO clones. **D)** GSEA enrichment for mitochondria-related terms in WT vs NOCT<sup>-/-</sup> cells as in Fig. 3F. Source data are provided as a Source Data file.

**A**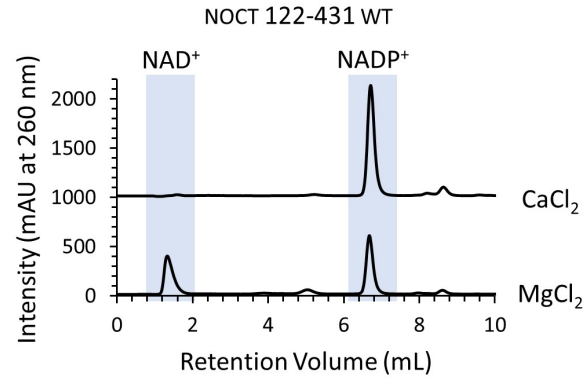**B**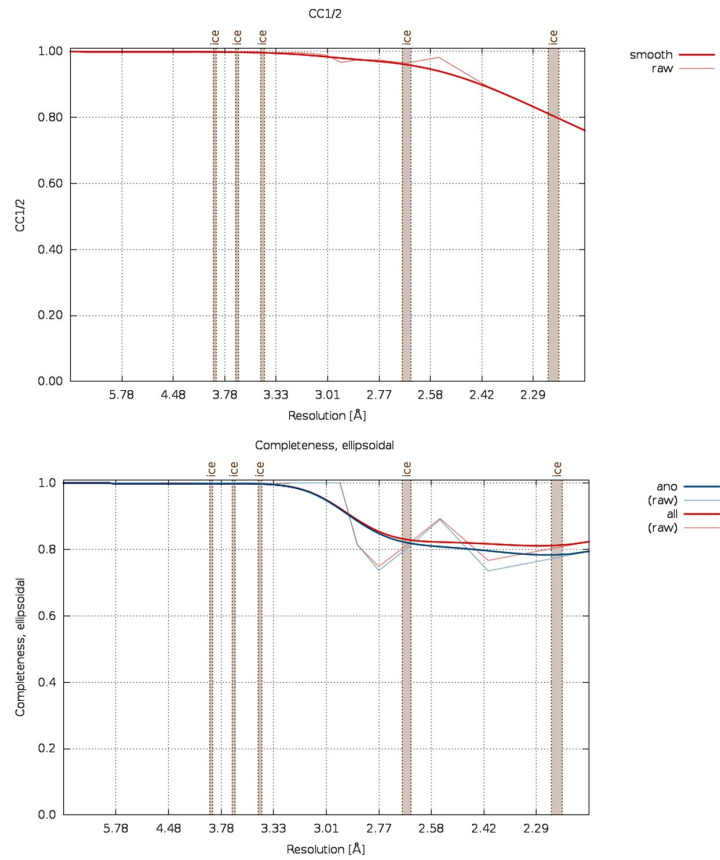

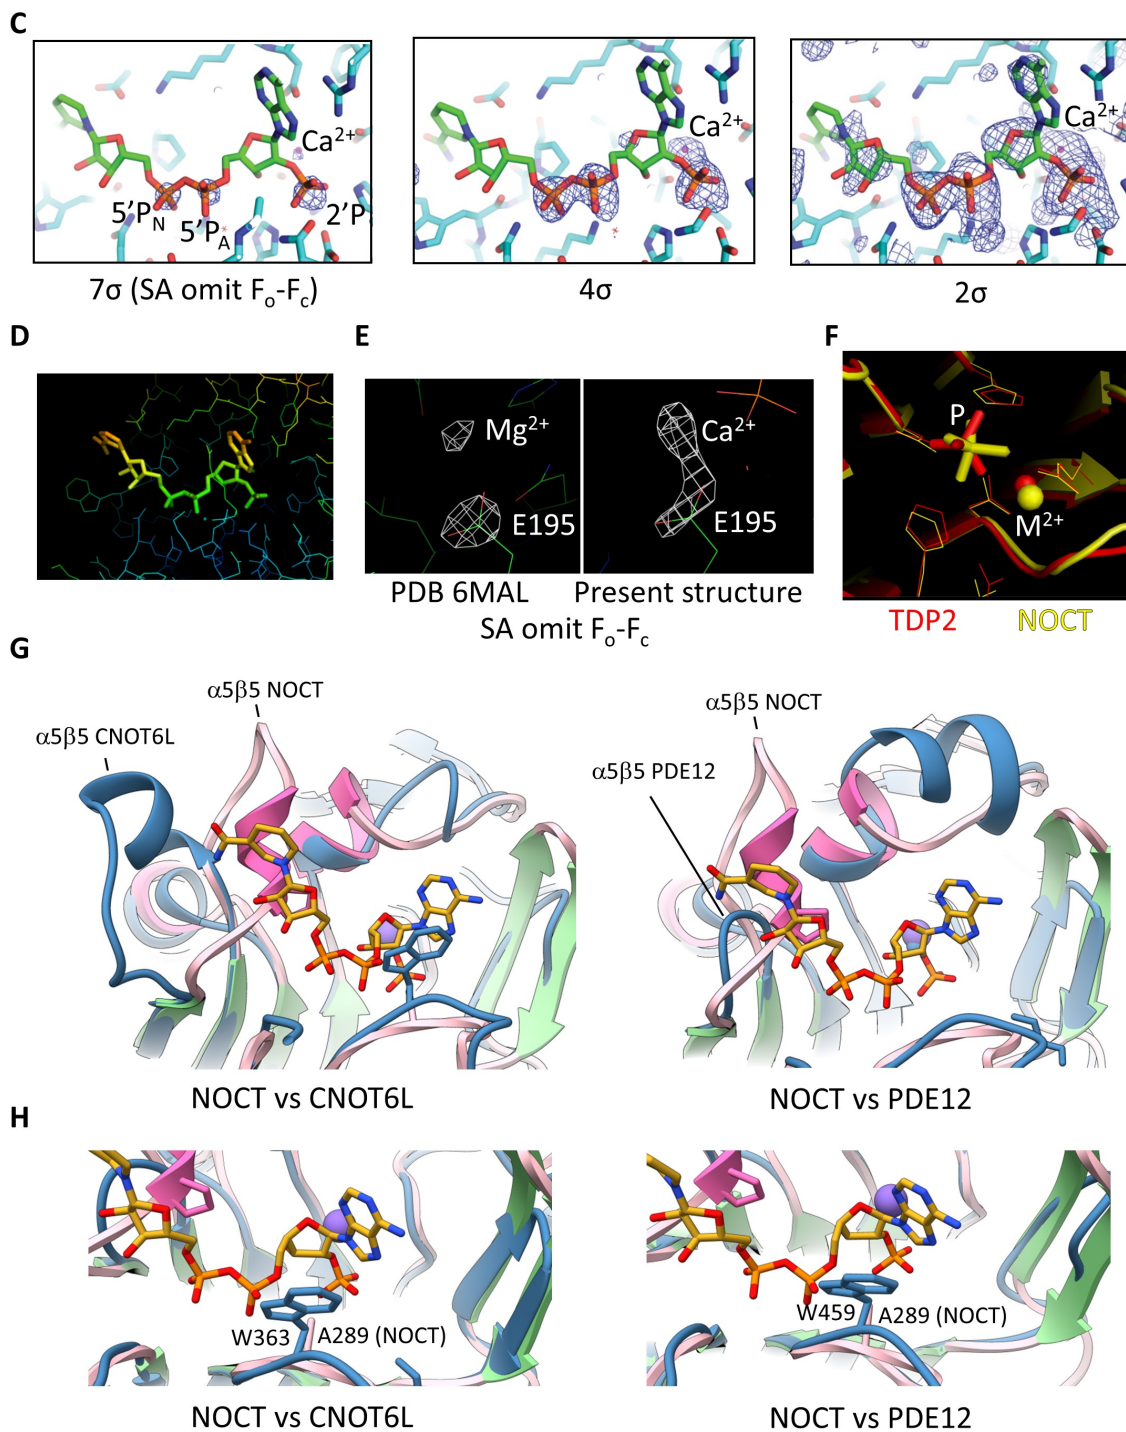

**Supplementary Figure S4. Diffraction properties of NOCT•NADPH crystals and structure comparisons with deadenylases. A)** NOCT 122-431 activity is impaired by the addition of 2 mM CaCl<sub>2</sub>. Reactions were conducted for 30 minutes as in Fig. 2B. **B)**

Completeness and  $CC_{1/2}$  plots for anisotropic diffraction data processing by STARANISO (<http://staraniso.globalphasing.org/cgi-bin/staraniso.cgi>). **C)** Simulated annealing (2000K) omit map for NADPH at three contour levels indicated on the figure. **D)** B-factor-colored NADPH (see also Supplementary Table S1). B-factors are scaled from highest (95.29, red) to lowest (21.91, blue). **E)** Simulated annealing omit map for the previously published NOCT•Mg<sup>2+</sup> complex 6MAL (Mg<sup>2+</sup> and CD+OE1+OE2 atoms of E195 were omitted) vs a similar map for the NOCT•NADPH•Ca<sup>2+</sup> complex (Ca<sup>2+</sup> and CD+OE1+OE2 atoms of E195 were omitted). The electron density for Ca<sup>2+</sup> is stronger than that for Mg<sup>2+</sup>, as expected due to higher electron count in Ca<sup>2+</sup>. **F)** Superposition of the TDP2 DNA repair enzyme in complex with 5'-P DNA (PDB ID 5INL) vs the NOCT•NADPH•Ca<sup>2+</sup> complex. **G)** NOCT superimposition with CNOT6L and PDE12 showing  $\alpha 5\beta 5$  motifs. **H)** NOCT superimposition with CNOT6L and PDE12 showing a tryptophan in place of the NOCT alanine 289.



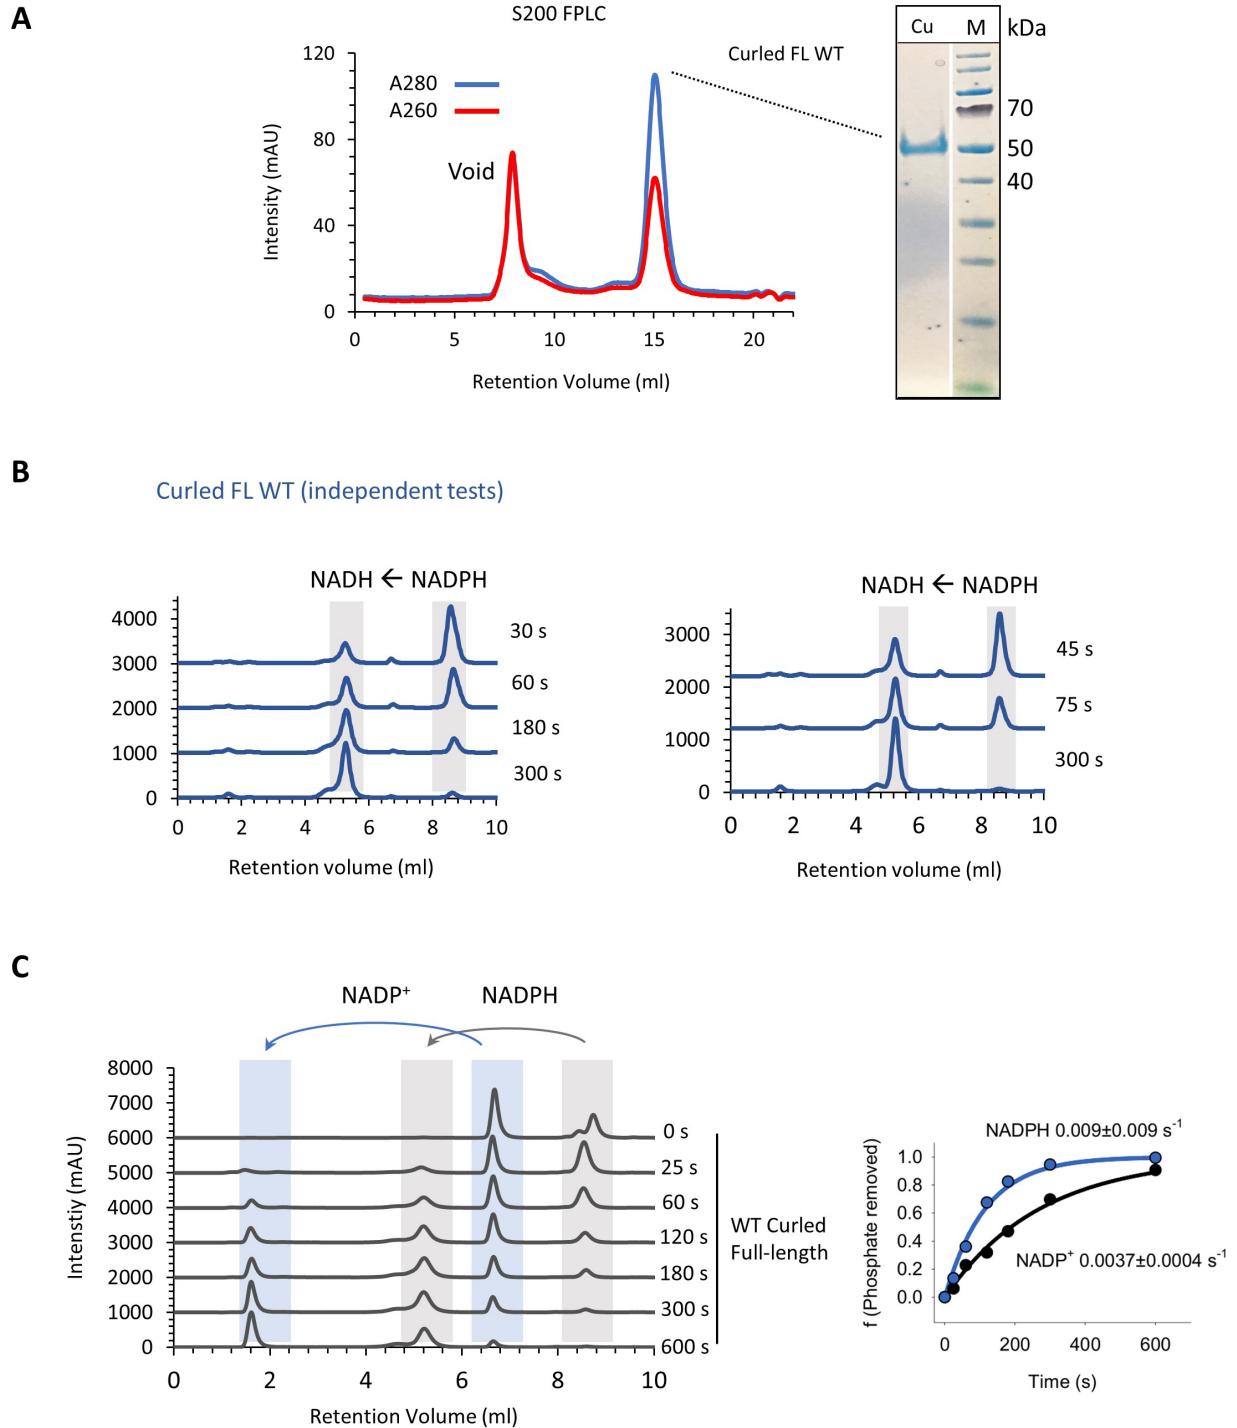

**Supplementary Figure S5. Curled purification and activity assay. A)** S200 size exclusion purification trace for full length *Drosophila melanogaster* Curled protein and NuPAGE analysis of the peak. The protein was concentrated to 0.9 mg/ml (19.23  $\mu$ M).

**B)** Cleavage of NADPH (1 mM) by Curled (0.5  $\mu$ M) related to Fig. 5C. **C)** Left: NADP<sup>+</sup> and NADPH cleavage by Curled under conditions of kinetic competition as in Supplementary Figure S2A. Reactions contained 500 nM Curled and 1 mM of each nucleotide. Right: quantitation of the data fitted to single-exponential kinetics. Source data are provided as a Source Data file.

## Supplementary Tables

### Supplementary Table S1. Data collection and refinement statistics<sup>&</sup>

Human Nocturnin 122-431 • NADPH • Ca<sup>2+</sup>

| Data collection                                     |                                  |
|-----------------------------------------------------|----------------------------------|
| Space Group                                         | P4 <sub>1</sub> 2 <sub>1</sub> 2 |
| Cell dimensions                                     |                                  |
| <i>a</i> , <i>b</i> , <i>c</i> (Å)                  | 62.88, 62.88, 153.59             |
| $\alpha$ , $\beta$ , $\gamma$ (°)                   | 90.0, 90.0, 90.0                 |
| Resolution (Å)                                      | 29.09-2.05 (2.33–2.05)           |
| <i>R</i> <sub>pim</sub>                             | 0.034 (0.443)                    |
| CC(1/2)                                             | 0.999 (0.937)                    |
| <i>I</i> / $\sigma$ <i>I</i>                        | 18.04 (2.93) {14.27 (1.86)}*     |
| Completeness                                        | 0.999 (0.998) {0.932 (0.824)}*   |
| Redundancy                                          | 12.73 (12.06)                    |
| Refinement                                          |                                  |
| Resolution (Å)                                      | 2.70                             |
| No. unique reflections                              | 8,470 (523)                      |
| <i>R</i> <sub>work</sub> / <i>R</i> <sub>free</sub> | 0.2063/0.2630                    |
| No. atoms                                           | 2,429                            |
| Protein                                             | 2,362                            |
| NADPH                                               | 48                               |
| Ca                                                  | 1                                |
| Water                                               | 18                               |
| <i>B</i> -factors                                   |                                  |
| Protein                                             | 48.67                            |
| NADPH                                               | 73.86                            |
| Ca                                                  | 50.79                            |
| Water                                               | 40.44                            |
| R.m.s deviations                                    |                                  |
| Bond lengths (Å)                                    | 0.005                            |
| Bond angles (°)                                     | 0.802                            |
| Ramachandran plot (%)                               |                                  |
| Favored                                             | 97.28                            |
| Allowed                                             | 2.72                             |
| Disallowed                                          | 0.0                              |

Highest-resolution shell is shown in parentheses.

<sup>&</sup>See Source Data file for stereo map.

\*Values from XDS vs {anisotropy processed values from staraniso}.

## Supplementary Table S2. Oligonucleotide sequences

| ID                           | Sequence 5'-3'                                                                                        | Use                                |
|------------------------------|-------------------------------------------------------------------------------------------------------|------------------------------------|
| ME66.hNOCT.Fwd               | GTGTCTCGAGATGTTT<br>CATAGTCCGCGG                                                                      | amplify from A549<br>cDNA          |
| ME70.hNOCT.Rev               | GTGTGCGGCCGCTTATGAAAGT<br>CCATCAGATTC                                                                 |                                    |
| ME68.hNOCT.FL.InFrame        | CGGATCTGGAAGTTCTGTTCCAGG<br>GGCCCATGTTTCATAGTCCGCGGCCGCTCTGCTCG                                       | NOCT in frame with<br>pGEX HRV 3C  |
| ME79.Noct.d1-121             | CGGATCTGGAAGTTCTGTTCCAGGGG<br>CCCCCTCCCCGGTTCCAGAGGGATTTTGTGGATC                                      | generate NOCT 122-<br>431          |
| ME81.Noct.E195A              | CAGCCTGATATATTGTGCCTCCAA<br>GCTGTGGACCACTATTTTGACACCTTCC                                              | point mutant                       |
| ME82.Noct.R290A              | CATCGCTGTTACCCATCTAAAAGCAGCTACTGG<br>CTGGGAGCGGTTTTCGATCAGC                                           | point mutant                       |
| ME89.Noct.K365A.R367A        | GTCAGAACCCCCATACACTACCTGGGCGAT<br>CGCGACCTCAGGGGAGTGCAGGCACACCC                                       | point mutant                       |
| JD88.Noct.pGEX.N-FLAG        | ctggaagtctgttccaggggCCcgactacaaggacgac<br>gatgacaagATGTTTCATAGTCCGCGGCCGCTC                           | add N-term FLAG to<br>NOCT in pGEX |
| JD89.Noct.del.d1-125         | gatctggaagtctgttccaggggCCCCAGAGGGATTTTG<br>TGGATCTGAGG                                                | generate NOCT 126-<br>431          |
| JD90.Noct.R295A              | ACGCACTGGCTGGGAGGCGTTTTCGAT<br>CAGCTCAAGGC                                                            | point mutant                       |
| JD102.NOCT.D160A             | AAGCTCTTGAGAAGGCAAAGCGAACTTTGT<br>ACAGTGCCCTGTTGAAGC                                                  | point mutant                       |
| JD112.Noct.del.P220-<br>N231 | GGCTATCAAGGCACGTTTTTCCCCAAAGGACC<br>AGATGGTTGTGCCTTATTTTTTC                                           | internal deletion                  |
| JD113.NOCT.D160A.F162Y       | AAGCTCTTGAGAAGGCAAAGCGAACT<br>ATGTACAGTGCCCTGTTGAAGC                                                  | point mutant                       |
| JD114.NOCT.R367A             | CACTACCTGGAAGATCGCGACCTCAGG<br>GGAGTGCAG                                                              | point mutant                       |
| JD133.NOCT H286N             | GTTCTGCATCGCTGTTACCAACCTAAAAG<br>CACGCACTGGCTG                                                        | point mutant                       |
| JD146.NOCT.D128A             | CCTCCCCGGTTCCAGAGGGCGTTTGTGG<br>ATCTGAGGACAGATT                                                       | point mutant                       |
| SR.FlagNOCT-F_EcoRI          | TATATAGAATTCCACCATGGATTACAAGGATGACG<br>ACGATAAGATGTTTCATAGTCCGCGGCCGCTC                               | subclone into pcDNA<br>4.0/TO      |
| SR.NOCT-R_NotI               | TATATAGCGGCCGCTTATGAAA<br>GTCCATCAGATTCTC                                                             |                                    |
| JD130.NOCT.loopout-MT        | GATTACAAGGATGACGACGATAAGTATA<br>GTGCTCTCGCCAAGACACTGAACAGC                                            | generate NOCT 75-431               |
| ME92.N.FLAGdel.NOCT          | AGTCCAGTGTGGTGAATTCCACCATGGCGTTTC<br>ATAGTCCGCGGCCGCTCTGCTCGGCC<br>TTTACTGAGGAATCTGATGGACTTTCAGATTACA | remove N-term FLAG<br>tag          |
| JD136.C.FLAGins.NOCT         | AGGATGACGACGATAAGTAAGCGGC<br>CGCTCGAGTCTAGAGG                                                         | adds C-term FLAG tag               |

|                                            |                                                                                             |                                       |
|--------------------------------------------|---------------------------------------------------------------------------------------------|---------------------------------------|
| JD95.PDE12-F2-EcoRI                        | CACAGAATTCCGGAAGTCGCGAGATCTGAA                                                              | amplify PDE12 from A549 cDNA          |
| JD96.PDE12-R2-XmaI<br>JD110.PDE12 d1-154   | CACACCCGGGAGGAGGGCTGAACATTTTACCA<br>TCTGGAAGTTCTGTTCCAGGGGCCCTACAAGGT<br>GGAGCGCAACCCGCCCGC | PDE12 155-609                         |
| JD99.CNOT6L-F-XhoI                         | ATATCTCGAGGGACCGAGAGTGTTGGGAAG                                                              | amplify CNOT6L from A549 cDNA         |
| JD100.CNOT6L-R-NotI<br>JD111.CNOT6L d1-157 | ATATGCGGCCGAGCAACAGATCCCCGTCTTG<br>ctggaagttctgttccaggggCCCATGCTTGACAATCT<br>CGCAGTTCATCC   | CNOT6L 158-555                        |
| ME95.Curled.inframe                        | CGGATCTGGAAGTTCTGTTCCAGGGGCCCATGGGT<br>CATTAACTCGGCCCAAAG                                   | Curled in frame with pGEX HRV 3C      |
| ME96.Curled.E140A                          | GAACCAGCCCGATGTGATTTGTCTGCAAGCGGTAGA<br>CCACTTCAAGTTTCTGCAGACCG                             | point mutant                          |
| TA.NotI-cu-03                              | CTCGAGAATGGGTTCAATTAACTCGGCCCC                                                              | amplify Curled                        |
| TA.XhoI-cu-06<br>cu02                      | GCGGCCGCTTCTATTGAATGGATCCATGC<br>AGCTGCAAACGTAGTGCAACG                                      | reverse transcribe                    |
| Noct_sg3a<br>Noct_sg3b                     | caccgCATTGCATAACCCTGATAGG<br>aaacCCTATCAGGGTTATGCAATGc                                      | gRNAs for making NOCT CRISPR knockout |

### Supplementary Table S3. Antibodies used

| Antibodies                                                 | Dilution Used            | Manufacturer             | Catalogue # | Lot #    | Note            |
|------------------------------------------------------------|--------------------------|--------------------------|-------------|----------|-----------------|
| $\alpha$ 1a Tubulin (7-RY28)                               | WB- 1:500                | Santa Cruz Biotechnology | sc-134237   | C1218    | Raised in mouse |
| PARP1 (B-10)                                               | WB- 1:500                | Santa Cruz Biotechnology | sc-74470    | B2118    | Raised in mouse |
| COX4 (F-8)                                                 | WB- 1:500                | Santa Cruz Biotechnology | sc-376731   | D0418    | Raised in mouse |
| Monoclonal ANTI-FLAG M2                                    | IF- 1:500<br>WB- 1:2,000 | Sigma                    | F3165       | SLBT6752 | Raised in mouse |
| Peroxidase-conjugated AffiniPure Goat Anti-Mouse IgG (H+L) | WB- 1:10,000             | Jackson ImmunoResearch   | 115-035-062 | 132504   | Raised in goat  |

Note: IF - immune-fluorescence, WB - western blot
