# Supplementary material for: The metabolites NADP+ and NADPH are the targets of the circadian protein Nocturnin (Curled)
Source: PubMed Central journal article supplement (PMC6542800; doi:10.1038/s41467-019-10125-z), 2019-05-30
Supplement: 41467_2019_10125_MOESM4_ESM.pdf [file 41467_2019_10125_MOESM4_ESM.pdf]

## Description of Additional Supplementary Files

File Name: Supplementary Data 1

Description: Mass spectrometry metabolite screening data from bovine liver and HEK293 cells. Fold ratios (Fig. 1B) were obtained after removing metabolites that have  $\geq 20,000$  counts in WT NOCT sample (i.e. true substrates must be strongly depleted). Metabolites with  $\leq 10,000$  counts in the input (10,000 counts is the background) were removed to examine only robustly detected compounds found in all controls.

File Name: Supplementary Data 2

Description: Mass spectrometry metabolite data obtained in human A549 WT cells and two independent clones of NOCT<sup>-/-</sup> cells.

File Name: Supplementary Data 3

Description: Poly-A<sup>+</sup> RNA-seq read counts from A549 WT cells and two independent clones of NOCT<sup>-/-</sup> cells.
